# Supplementary material for: Diabetes technologies for children and adolescents with type 1 diabetes are highly dependent on coverage and reimbursement: results from a worldwide survey
Source: HighWire-hosted journal article supplement (doi:10.1136/bmjdrc-2021-002537), 2021-11-01
Supplement: bmjdrc-2021-002537supp001_data_supplement.pdf [file bmjdrc-2021-002537supp001_data_supplement.pdf]

## **Questions:**

- 1. Baseline profile of healthcare professionals (13 questions):** this section aims to assess providers' personal demographics and work profile.

Q1. Are you a prescribing practitioner?

- a) Yes
- b) No

Q2. What is your age?

- a) Under 30
- b) 30 to 40
- c) 41 to 50
- d) 51 to 60
- e) Over 60

Q3. What is your gender?

- a) Female
- b) Male
- c) Other, please specify: \_\_\_\_\_

Q4. In what country do you work? (LIST OF OPTIONS)

Q5. Do you belong to a minority racial/ethnic group in your country of service?

- a) Yes
- b) No

Q6. What is your main clinical role?

- a) Resident
- b) Primary care practitioner, pediatrician, family doctor, or an internal medicine doctor
- c) Pediatric endocrinology fellow
- d) Pediatric endocrinologist/diabetologist
- e) Adult Endocrinology fellow
- f) Adult endocrinologist/diabetologist
- g) Nurse practitioner or a registered nurse
- h) Other (please, specify): \_\_\_\_\_

Q7. How long have you been in practice since completing your training?

- a) Less than 3 years
- b) 3 to 5 years

- c) 5 to 10 years
- d) More than 10 years

Q8. Where is your main practice setting? (You can choose more than one option)

- a) Private hospital/outpatient clinic
- b) Public or governmental hospital/outpatient clinic
- c) University or academic hospital/outpatient clinic
- d) Primary care center
- e) General practitioner office
- f) Other, please specify: \_\_\_\_\_

Q9. If you are not an endocrinologist/diabetologist, do you have access to one as a consultant?

- a) Yes
- b) No
- c) I am an endocrinologist/diabetologist

Q10. How many patients with type 1 diabetes are followed in your clinic?

- a) Less than 100
- b) 100 to 200
- c) 201 to 500
- d) More than 500

Q11. Does your country/region have universal health care insurance/coverage for the use of insulin pump and/or the CGM systems?

- a) Yes
- b) No
- c) Partially

Q12. In your country/region, do private insurance companies cover/reimburse for insulin pump and/or CGM systems?

- a) Yes
- b) No
- c) Partially

Q13. Are you an International Society for Pediatric and Adolescent Diabetes (ISPAD) member?

- a) Yes
- b) No

**2. Regarding the use of insulin pumps (10 questions):** this section aims to assess personal thoughts when providers prescribe or refuse insulin pump.

Q14. Are insulin pumps available in your practice setting?

- a) Yes
- b) No

Q15. Is there more than one insulin pump brand available in your practice setting?

- a) Yes
- b) No

Q16. What is the percentage of patients on insulin pump in your center?

- a) Less than 10%
- b) Between 10 to 30%
- c) Between 30 to 50%
- d) More than 50%

Q17. What percentages of patients counselled by you agree/consent to start on insulin pump therapy?

- a) Less than 25%
- b) Between 25 to 50%
- c) Between 50 to 75%
- d) More than 75%

Q18. What is your opinion on the reasons why patients and caregivers turn down technology after being offered it? (multiple choice)

- a) Unawareness
- b) Fear
- c) Shame
- d) Patient does not want to wear something on its body
- e) Parents cannot afford and/or maintain therapy
- f) Reduced diabetes literacy
- g) Family preference for keeping on injections and fingerstick
- h) Other, please specify: \_\_\_\_\_

Q19. Do you agree with the statement **“All patients, regardless of circumstance, should be offered insulin pump therapy”**?

- a) Totally agree
- b) Agree

- c) Partially agree
- d) Disagree
- e) Totally disagree

Q20. Do you agree with the statement **“No patient, regardless of circumstance, should be offered insulin pump therapy”**?

- a) Totally agree
- b) Agree
- c) Partially agree
- d) Disagree
- e) Totally disagree

Q21. On a scale from 1 (not all relevant) to 5 (extremely relevant), what is the importance you give for the following indications to start a patient on insulin pump therapy? (MATRIX/RATING SCALE: 1 – not all relevant; 2- slightly relevant; 3 – relevant; 4 – fairly relevant; 5 – extremely relevant)

- a) Patient age
- b) History of severe hypoglycemia (values of glycemia <54 mg/dL (<3.0 mmol/L), or severe cognitive impairment, including coma and convulsions, requiring external assistance by another person to actively administer carbohydrates, glucagon, or take other corrective actions) or hypoglycemia unawareness
- c) Suboptimal glycemic control despite good compliance
- d) Patient or caregiver's preference
- e) Requirement of small doses of insulin

Q22. On a scale from 1 (not at all a contraindication) to 3 (an absolute contraindication), what is the importance you give when decide to start a patient on insulin pump therapy? (MATRIX/RATING SCALE: 1-not all a contraindication; 1- relative contraindication; 2- absolute contraindication).

- a) Age less than three years old
- b) History of infrequent blood glucose monitoring (less than three a day) or not on CGM
- c) One or more episodes of diabetic ketoacidosis
- d) Inadequate parental/caregiver supervision
- e) Infrequent follow-up

Q23. Do you consider relevant the following socioeconomic factors when you prescribe insulin pumps? (MATRIX/RATING SCALE: 1 – totally irrelevant; 2 – irrelevant; 3 – indifferent; 4 – relevant; 4 – totally relevant)

| Factors of socio-economic health determinants | 1 | 2 | 3 | 4 | 5 |
|-----------------------------------------------|---|---|---|---|---|
| i. Place of residence: Rural versus urban     |   |   |   |   |   |
| ii. Race, ethnicity or citizenship            |   |   |   |   |   |

|                                                                                              |  |  |  |  |  |
|----------------------------------------------------------------------------------------------|--|--|--|--|--|
| <b>iii. Family/patient speaks/comprehend different language than diabetes team</b>           |  |  |  |  |  |
| <b>iv. Parental affordability to maintain the therapy or provision by insurance coverage</b> |  |  |  |  |  |
| <b>v. Gender</b>                                                                             |  |  |  |  |  |
| <b>vi. Religious affiliation</b>                                                             |  |  |  |  |  |
| <b>vii. Parental educational level</b>                                                       |  |  |  |  |  |
| <b>viii. Family income</b>                                                                   |  |  |  |  |  |
| <b>ix. Family social networking: belonging to social support groups</b>                      |  |  |  |  |  |

**3. Regarding the use of continuous glucose monitoring (CGM) systems (4 questions):** this section aims to assess personal thoughts when providers prescribe or refuse CGM.

Q24. Are there any CGM systems available in your practice setting?

- a) Yes
- b) No

Q25. Is there more than one CGM system brand available in your practice setting?

- a) Yes
- b) No

Q26. What is the percentage of patients on CGM in your unit?

- a) Less than 10%
- b) Between 10 to 30%
- c) Between 30 to 50%
- d) More than 50%

Q27. What percentages of patients counselled by you agree/consent to start on CGM?

- a) Less than 25%
- b) Between 25 to 50%
- c) Between 50 to 75%
- d) More than 75%

**4. According to the following vignettes would you recommend insulin pump, CGM, both or neither of them? In all the scenarios, patients have type 1 diabetes and have been already introduced to diabetes education regarding the use of technological devices. (6 questions)**

**Infant and toddlers:**

Q28. One-year-old girl, during her partial remission phase, receiving 2.5 IU/day of basal long-acting analog insulin, and doing corrections with rapid-acting analogs when needed, has faced two **severe hypoglycemia episodes**, one of them with seizures. She has a **single mother, unemployed**, and they live in a country where there is **universal coverage** for CSII and CGM.

- i. I would recommend insulin pump for this girl
- ii. I would recommend CGM for this girl
- iii. I would recommend both insulin pump and CGM for this girl
- iv. I would not recommend either of them

Q29. One-year-old girl, during her partial remission phase, receiving 2.5 IU/day of basal long-acting analog insulin, and doing corrections with rapid-acting analogs when needed, has faced two **severe hypoglycemia episodes**, one of them with seizures. She **lives with her parents in a wealthy village four-hour away from nearest diabetes center**, and **family has full insurance coverage** for CSII and CGM.

- i. I would recommend insulin pump for this girl
- ii. I would recommend CGM for this girl
- iii. I would recommend both insulin pump and CGM for this girl
- iv. I would not recommend either of them

**School Age:**

Q30. A 6-year-old girl has been suffering **blood sugar fluctuations** which include one episode of **diabetic ketoacidosis** last month. Her parents are facing a **difficult economic situation** because both are **unemployed and do not have insurance coverage for diabetes suppliers**. The **young parents have not completed their secondary studies**, and **family lives in a deprived area of a big city**.

- i. I would recommend insulin pump for this girl
- ii. I would recommend CGM for this girl
- iii. I would recommend both insulin pump and CGM for this girl
- iv. I would not recommend either of them

Q31. A 6-year-old girl has been suffering **blood sugar fluctuations** which include one episode of **diabetic ketoacidosis** last month. The family recently moved to a **new country** where there is **universal healthcare and coverage for CSII and CGM**. The **family belongs to a minority religion** and has **low language comprehension** in their new country.

- i. I would recommend insulin pump for this girl
- ii. I would recommend CGM for this girl
- iii. I would recommend both insulin pump and CGM for this girl
- iv. I would not recommend either of them

## Adolescent

Q32. An adolescent **boy**, from a **racial/ethnic minority group**, diagnosed eight years ago, lives with his grandmother who **works as a nurse** and is his **only guardian**. Their health insurance recently approved him the provision of an intermittent CGM (Libre flash). He has suffered **uncontrolled blood glucose**, despite been on MDI with intensive basal-bolus requiring 1.8 IU/kg/day. Every year he **participates in a regional diabetes camp**.

- i. I would recommend insulin pump for this boy
- ii. I would recommend insulin pump for this boy after having blood glucose controlled
- iii. I would recommend keeping this boy only on CGM and focusing on glucose control
- iv. I would recommend both insulin pump and CGM for this boy
- v. I would not recommend either of them

Q33. A Caucasian adolescent **girl**, belonging to a major racial/ethnic group, diagnosed eight years ago, lives with **her grandparents who are retired**. Their health insurance recently approved her the provision of an intermittent CGM (Libre flash). She has been suffering **uncontrolled blood glucose**, despite been on MDI with intensive basal-bolus requiring 1.8 IU/kg/day. In the village where they live, there are **lacking of social support and counselling**.

- i. I would recommend insulin pump for this girl
- ii. I would recommend insulin pump for this girl after having blood glucose controlled
- iii. I would recommend keeping this girl only on CGM and focusing on glucose control
- iv. I would recommend both insulin pump and CGM for this girl
- v. I would not recommend either of them
