# Supplementary material for: Diabetes technologies for children and adolescents with type 1 diabetes are highly dependent on coverage and reimbursement: results from a worldwide survey
Source: HighWire-hosted journal article supplement (doi:10.1136/bmjdrc-2021-002537), 2021-11-01
Supplement: bmjdrc-2021-002537supp002_data_supplement.pdf [file bmjdrc-2021-002537supp002_data_supplement.pdf]

Supplementary file 2: Uptake of insulin pumps and continuous glucose monitoring (CGM) systems depending on healthcare coverage or insurance reimbursement for diabetes technologies

|                                                                   | Universal/partial<br>healthcare coverage | No healthcare<br>coverage | P value  | Private insurance<br>companies cover/<br>reimburse | Private insurance<br>companies do not<br>cover/reimburse | P value  |
|-------------------------------------------------------------------|------------------------------------------|---------------------------|----------|----------------------------------------------------|----------------------------------------------------------|----------|
| <b>Use of insulin pump</b>                                        |                                          |                           | < 0.0001 |                                                    |                                                          | < 0.0001 |
| • Less than 10%                                                   | 11.8%                                    | 70.6%                     |          | 20.6%                                              | 50.9%                                                    |          |
| • 10-30%                                                          | 27.7%                                    | 4.7%                      |          | 15.5%                                              | 20.8%                                                    |          |
| • 30-50%                                                          | 33.6%                                    | 12.9%                     |          | 32.0%                                              | 17.9%                                                    |          |
| • More than 50%                                                   | 26.9%                                    | 11.8%                     |          | 32.0%                                              | 10.3%                                                    |          |
| <b>Agreement to start on insulin pump</b>                         |                                          |                           | <0.0001  |                                                    |                                                          | < 0.0001 |
| • Less than 25%                                                   | 8.4%                                     | 47.6%                     |          | 9.4%                                               | 38.7%                                                    |          |
| • 25-50%                                                          | 21.8%                                    | 15.4%                     |          | 22.9%                                              | 16.0%                                                    |          |
| • 50-75%                                                          | 31.1%                                    | 22.6%                     |          | 34.4%                                              | 20.7%                                                    |          |
| • More than 75%                                                   | 38.9%                                    | 14.3%                     |          | 33.3%                                              | 24.5%                                                    |          |
| <b>Use of CGM systems</b>                                         |                                          |                           | <0.01    |                                                    |                                                          | <0.01    |
| • Less than 10%                                                   | 11.1%                                    | 47.7%                     |          | 15.4%                                              | 43.9%                                                    |          |
| • 10-30%                                                          | 14.8%                                    | 23.9%                     |          | 13.5%                                              | 28.0%                                                    |          |
| • 30-50%                                                          | 16.7%                                    | 14.8%                     |          | 19.2%                                              | 11.2%                                                    |          |
| • More than 50%                                                   | 57.4%                                    | 14.8%                     |          | 51.9%                                              | 16.8%                                                    |          |
| <b>Agreement to start on CGM system</b>                           |                                          |                           | <0.01    |                                                    |                                                          | <0.01    |
| • Less than 25%                                                   | 3.7%                                     | 32.6%                     |          | 9.8%                                               | 28.3%                                                    |          |
| • 25-50%                                                          | 16.7%                                    | 20.9%                     |          | 11.8%                                              | 20.7%                                                    |          |
| • 50-75%                                                          | 20.4%                                    | 26.7%                     |          | 31.4%                                              | 27.4%                                                    |          |
| • More than 75%                                                   | 59.3%                                    | 19.8%                     |          | 47.1%                                              | 23.6%                                                    |          |
| <b>Reason why patients turndown<br/>technology:</b>               |                                          |                           | <0.0001  |                                                    |                                                          | 0.03     |
| • Family preference for keeping<br>on injections and fingersticks | 7.5%                                     | 4.7%                      |          | 8.2%                                               | 4.7%                                                     |          |
| • Fear                                                            | 4.2%                                     | 3.5%                      |          | 3.1%                                               | 4.7%                                                     |          |
| • Parents cannot afford or<br>maintain therapy                    | 17.5%                                    | 57.6%                     |          | 26.5%                                              | 41.5%                                                    |          |
| • Patient does not want to wear<br>something on its body          | 65.8%                                    | 28.2%                     |          | 58.2%                                              | 42.4%                                                    |          |

|                                                                                                                        |       |       |       |       |       |      |
|------------------------------------------------------------------------------------------------------------------------|-------|-------|-------|-------|-------|------|
| • Unawareness of technologies                                                                                          | 3.3%  | 3.5%  |       | 1.0%  | 5.7%  |      |
| • Reduced diabetes literacy                                                                                            | 0.8%  | 1.2%  |       | 2.0%  | 0     |      |
| • Not available                                                                                                        | 0.8%  | 1.2%  |       | 1.0%  | 0.9%  |      |
| <b>Agreement with the statement “All patients, regardless of circumstance, should be offered insulin pump therapy”</b> | 85.2% | 78.9% | 0.12  | 85.0% | 79.6% | 0.13 |
| <b>Disagreement with the sentence “No patient, regardless of circumstance, should be offered insulin pump therapy”</b> | 87.3% | 86.6% | 0.70  | 86.2% | 87.7% | 0.88 |
| <b>Relevant factors when starting a patient on insulin pump <sup>a</sup></b>                                           |       |       |       |       |       |      |
| • <b>Extremely relevant:</b>                                                                                           |       |       |       |       |       |      |
| ○ Age                                                                                                                  | 35.6% | 31.9% | 0.75  | 28.2% | 39.4% | 0.20 |
| ○ History of severe hypoglycemia                                                                                       | 58.9% | 55.1% | 0.79  | 50.6% | 62.8% | 0.32 |
| ○ Suboptimal glycemic control                                                                                          | 44.1% | 35.6% | 0.07  | 34.5% | 44.8% | 0.15 |
| ○ Requirement of small dosage of insulin                                                                               | 48.4% | 51.1% | 0.72  | 50.6% | 49.0% | 0.87 |
| • <b>Fairly relevant:</b>                                                                                              |       |       |       |       |       |      |
| ○ Patient or caregiver preference                                                                                      | 31.9% | 38.9% | 0.27  | 32.0% | 39.1% | 0.09 |
| <b>Contraindications to starting a patient on insulin pump <sup>b</sup></b>                                            |       |       |       |       |       |      |
| • <b>No contraindication:</b>                                                                                          |       |       |       |       |       |      |
| ○ Age less than 3 years old                                                                                            | 86.3% | 87.5% | 0.62  | 87.2% | 86.7% | 0.08 |
| ○ One or more episodes of diabetic ketoacidosis                                                                        | 50.0% | 48.0% | 0.96  | 50.0% | 48.1% | 0.96 |
| • <b>Relative contraindication</b>                                                                                     |       |       |       |       |       |      |
| ○ History of infrequent glucose monitoring/no use of CGM                                                               | 46.1% | 72.0% | 0.007 | 55.4% | 65.1% | 0.07 |
| ○ Inadequate                                                                                                           |       |       |       |       |       |      |

|                                       |       |       |      |       |       |      |
|---------------------------------------|-------|-------|------|-------|-------|------|
| <b>parental/caregiver supervision</b> | 45.9% | 56.0% | 0.47 | 53.4% | 48.7% | 0.41 |
| • <b>Absolute contraindication:</b>   |       |       |      |       |       |      |
| ○ <b>Infrequent follow-up</b>         | 48.7% | 49.4% | 0.13 | 41.6% | 56.2% | 0.17 |

a. On a scale from not at all relevant to extremely relevant, data were assessed for the most indicated option.

b. On a scale from not at all a contra-indication to an absolute contra-indication, data were assessed for the most indicated option.
